# Supplementary material for: Insights into the photocatalytic mechanism of g-C3N4/Cs2BBr6 (B = Pt, Sn, Ti) heterojunction photocatalysts by density functional theory calculations
Source: Royal Society of Chemistry journal article supplement (doi:10.1039/d4cy00387j), 2024-01-01
Supplement: d4cy00387j1.pdf [file d4cy00387j1.pdf]

## Supporting information

### Insights into the photocatalytic mechanism of g- C<sub>3</sub>N<sub>4</sub>/Cs<sub>2</sub>BBr<sub>6</sub> (B = Pt, Sn, Ti) heterojunction photocatalysts by density functional theory calculations

Xinyu Ye<sup>a,b</sup>, Yuanmiao Sun<sup>b,\*</sup>, Anmin Liu<sup>c,\*</sup>, Shizheng Wen<sup>d</sup>, and Tingli Ma<sup>a,\*</sup>

<sup>a</sup> Graduate School of Life Science and Systems Engineering, Kyushu Institute of Technology, 2-4  
Hibikino, Wakamatsu, Kitakyushu, Fukuoka 808-0196, Japan.

Email: tinglima@life.kyutech.ac.jp

<sup>b</sup> Institute of Technology for Carbon Neutrality, Shenzhen Institute of Advanced Technology,  
Chinese

Academy of Sciences, Shenzhen 518055, China.

Email: sunym@siat.ac.cn

<sup>c</sup> State Key Laboratory of Fine Chemicals, School of Chemical Engineering, Dalian University of  
Technology, China.

Email: liuanmin@dlut.edu.cn

<sup>d</sup> School of Physics and Electronic Electrical Engineering, Huaiyin Normal University, Huai'an,  
223300, China.

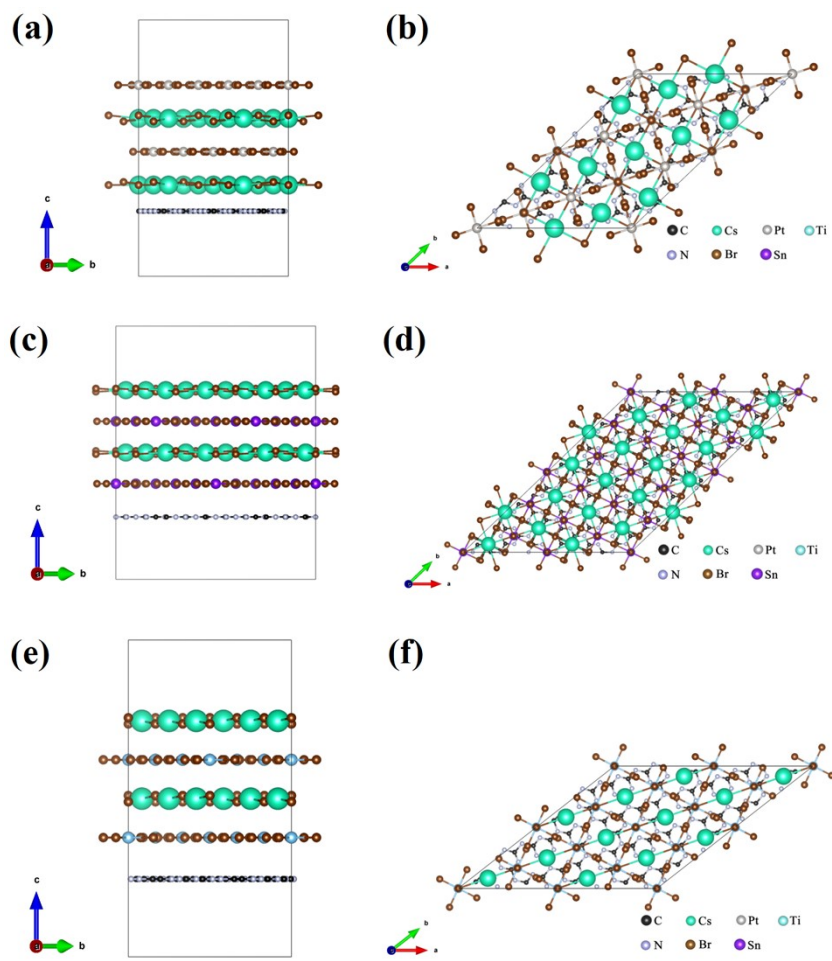

**Fig. S1** Theoretical models for (a, b)  $g\text{-C}_3\text{N}_4/\text{Cs}_2\text{PtBr}_6$ , (c, d)  $g\text{-C}_3\text{N}_4/\text{Cs}_2\text{SnBr}_6$ , and (e, f)  $g\text{-C}_3\text{N}_4/\text{Cs}_2\text{TiBr}_6$  heterojunctions.

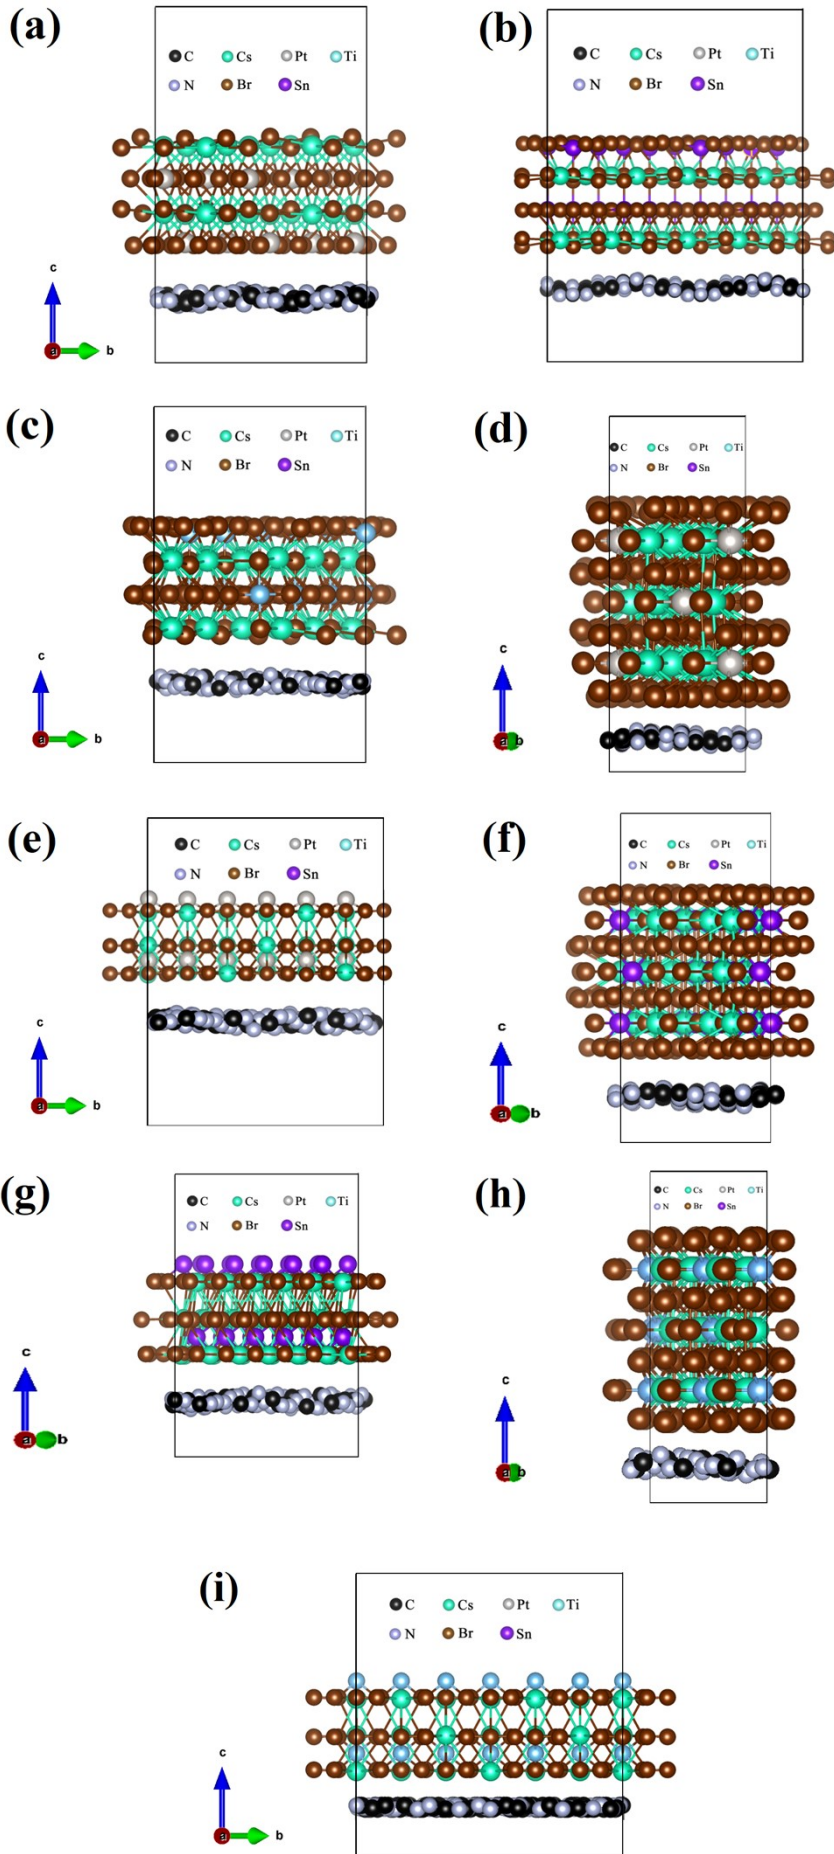

**Fig. S2** Optimized geometric structures of (a)  $g\text{-C}_3\text{N}_4/\text{Cs}_2\text{PtBr}_6(001)$  heterostructure with Pt-terminated surface, (b)  $g\text{-C}_3\text{N}_4/\text{Cs}_2\text{SnBr}_6(001)$  heterostructure with Cs-terminated surface, (c)  $g\text{-C}_3\text{N}_4/\text{Cs}_2\text{TiBr}_6(001)$  heterostructure with Cs-terminated surface, (d)  $g\text{-C}_3\text{N}_4/\text{Cs}_2\text{PtBr}_6(110)$  heterostructure, (e)  $g\text{-C}_3\text{N}_4/\text{Cs}_2\text{PtBr}_6(111)$  heterostructure, (f)  $g\text{-C}_3\text{N}_4/\text{Cs}_2\text{SnBr}_6(110)$  heterostructure, (g)  $g\text{-C}_3\text{N}_4/\text{Cs}_2\text{SnBr}_6(111)$  heterostructure, (h)  $g\text{-C}_3\text{N}_4/\text{Cs}_2\text{TiBr}_6(110)$  heterostructure and (i)  $g\text{-C}_3\text{N}_4/\text{Cs}_2\text{TiBr}_6(111)$  heterostructure.

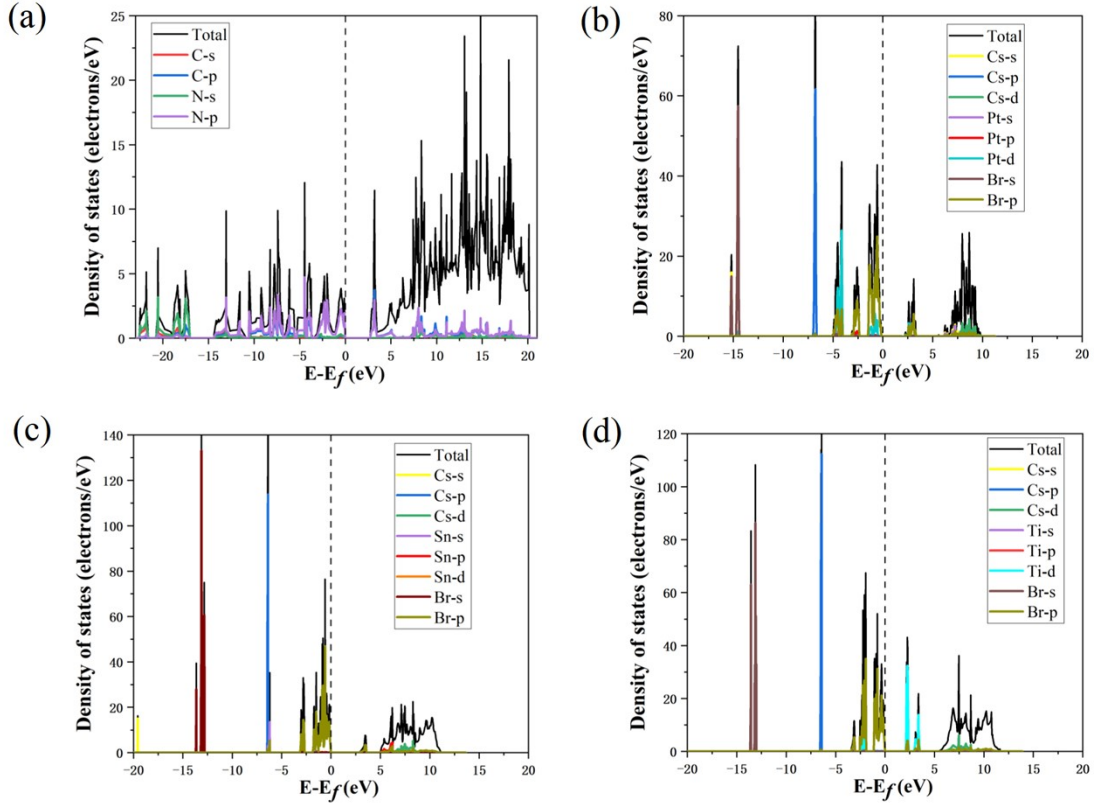

**Fig. S3** Calculated TDOS and PDOS of (a) monolayer  $g\text{-C}_3\text{N}_4$ , (b)  $\text{Cs}_2\text{PtBr}_6(001)$  slab, (c)  $\text{Cs}_2\text{SnBr}_6(001)$  slab, (d)  $\text{Cs}_2\text{TiBr}_6(001)$  slab over a wider energy range (-20 eV to 20 eV). The black vertical line is Fermi level.

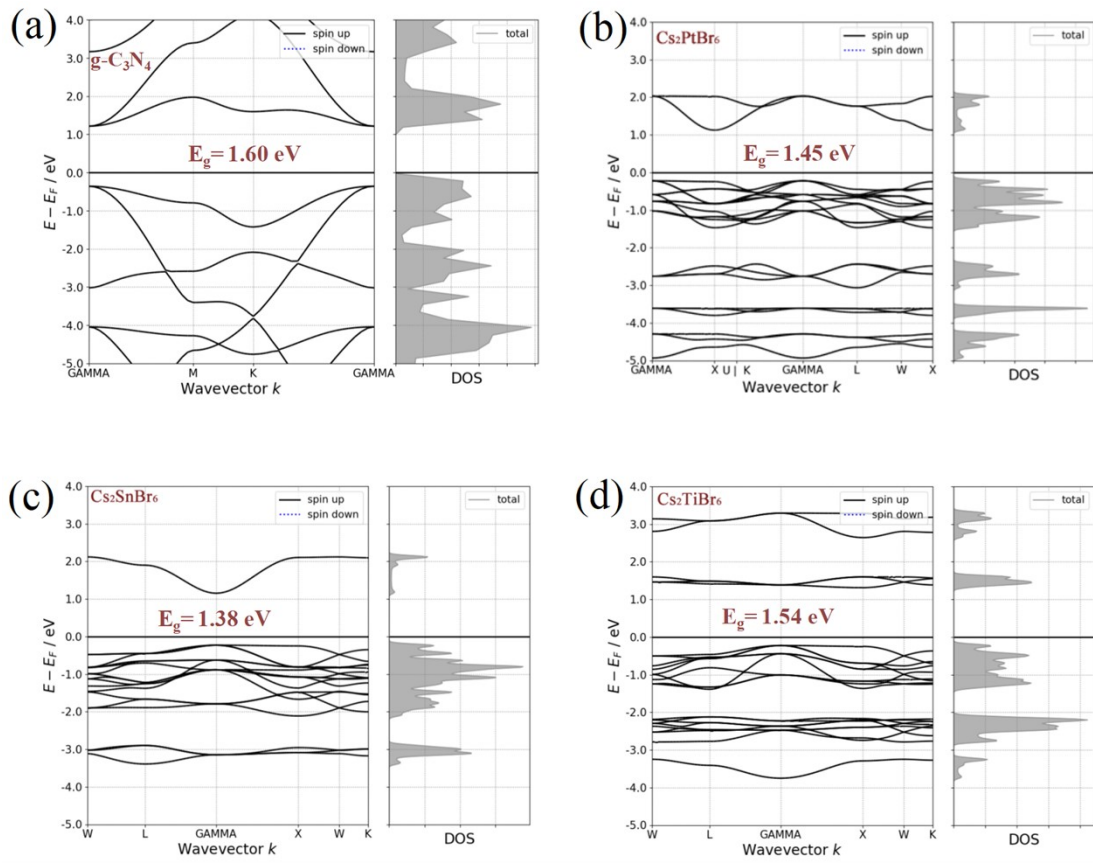

**Fig. S4** Band structures and density of states of the (a)  $g\text{-C}_3\text{N}_4$ , (b)  $\text{Cs}_2\text{PtBr}_6$ , (c)  $\text{Cs}_2\text{SnBr}_6$ , (d)  $\text{Cs}_2\text{TiBr}_6$  calculated by PBE functional.

**Table. S1** Binding energies (eV) of g-C<sub>3</sub>N<sub>4</sub>/Cs<sub>2</sub>PtBr<sub>6</sub> heterojunctions with varying Cs<sub>2</sub>PtBr<sub>6</sub> components.

| Species              | (001)<br>plane | (110)<br>plane | (111)<br>plane | Pt-terminated |
|----------------------|----------------|----------------|----------------|---------------|
| Binding energy (eV)  | -4.25          | -3.86          | -3.08          | -3.82         |
| Mismatch energy (eV) | 4.15           | 4.22           | 4.65           | 4.47          |

**Table. S2** Binding energies (eV) of g-C<sub>3</sub>N<sub>4</sub>/Cs<sub>2</sub>SnBr<sub>6</sub> heterojunctions with varying Cs<sub>2</sub>SnBr<sub>6</sub> components.

| Species              | (001)<br>plane | (110)<br>plane | (111)<br>plane | Cs-<br>terminated |
|----------------------|----------------|----------------|----------------|-------------------|
| Binding energy (eV)  | -1.65          | -1.01          | -1.50          | -1.60             |
| Mismatch energy (eV) | 10.26          | 11.28          | 10.36          | 10.31             |

**Table. S3** Binding energies (eV) of g-C<sub>3</sub>N<sub>4</sub>/Cs<sub>2</sub>TiBr<sub>6</sub> heterojunctions with varying Cs<sub>2</sub>TiBr<sub>6</sub> components.

| Species              | (001)<br>plane | (110)<br>plane | (111)<br>plane | Cs-<br>terminated |
|----------------------|----------------|----------------|----------------|-------------------|
| Binding energy (eV)  | -2.88          | -2.27          | -2.00          | -2.80             |
| Mismatch energy (eV) | 6.26           | 6.66           | 7.05           | 6.35              |

**Table. S4** Average Bader atomic charge (e), the minimum distance (Min dist. (Å)), and valency in isolated Cs<sub>2</sub>PtBr<sub>6</sub> and g-C<sub>3</sub>N<sub>4</sub>.

| Atom                     | C    | N     | Cs   | Pt   | Br    |
|--------------------------|------|-------|------|------|-------|
| Average Bader charge (e) | 0.64 | 7.47  | 8.04 | 9.52 | 7.55  |
| Valency                  | 3.36 | -2.47 | 0.96 | 0.48 | -0.55 |

**Table. S5** Average Bader atomic charge (e), the minimum distance (Min dist. (Å)), and valency in isolated Cs<sub>2</sub>SnBr<sub>6</sub> and g-C<sub>3</sub>N<sub>4</sub>.

| Atom                     | C    | N     | Cs   | Sn    | Br    |
|--------------------------|------|-------|------|-------|-------|
| Average Bader charge (e) | 0.88 | 7.20  | 8.01 | 11.92 | 7.90  |
| Valency                  | 3.12 | -2.20 | 0.99 | 2.08  | -0.90 |

**Table. S6** Average Bader atomic charge (e), the minimum distance (Min dist. (Å)), and valency in isolated Cs<sub>2</sub>TiBr<sub>6</sub> and g-C<sub>3</sub>N<sub>4</sub>.

| Atom                     | C    | N     | Cs   | Ti   | Br    |
|--------------------------|------|-------|------|------|-------|
| Average Bader charge (e) | 0.94 | 7.17  | 8.01 | 7.89 | 7.94  |
| Valency                  | 3.06 | -2.17 | 0.99 | 2.11 | -0.94 |
